# Supplementary material for: A mass spectrometric method for in-depth profiling of phosphoinositide regioisomers and their disease-associated regulation
Source: PubMed Central journal article supplement (PMC8749000; doi:10.1038/s41467-021-27648-z), 2022-01-10
Supplement: 41467_2021_27648_MOESM1_ESM.pdf [file 41467_2021_27648_MOESM1_ESM.pdf]

**Supplementary Information for:**

**A mass spectrometric method for in-depth profiling phosphoinositide regioisomers and their disease-associated regulation**

by Shin Morioka, Hiroki Nakanishi, Toshiyoshi Yamamoto, Junya Hasegawa, Emi Tokuda, Tomoya Hikita, Tomoko Sakihara, Yuuki Kugii, Chitose Oneyama, Masakazu Yamazaki, Akira Suzuki, Junko Sasaki and Takehiko Sasaki

This Supplementary Information section includes:

Supplementary Figures 1-5 and legends

Supplementary Tables 1-3

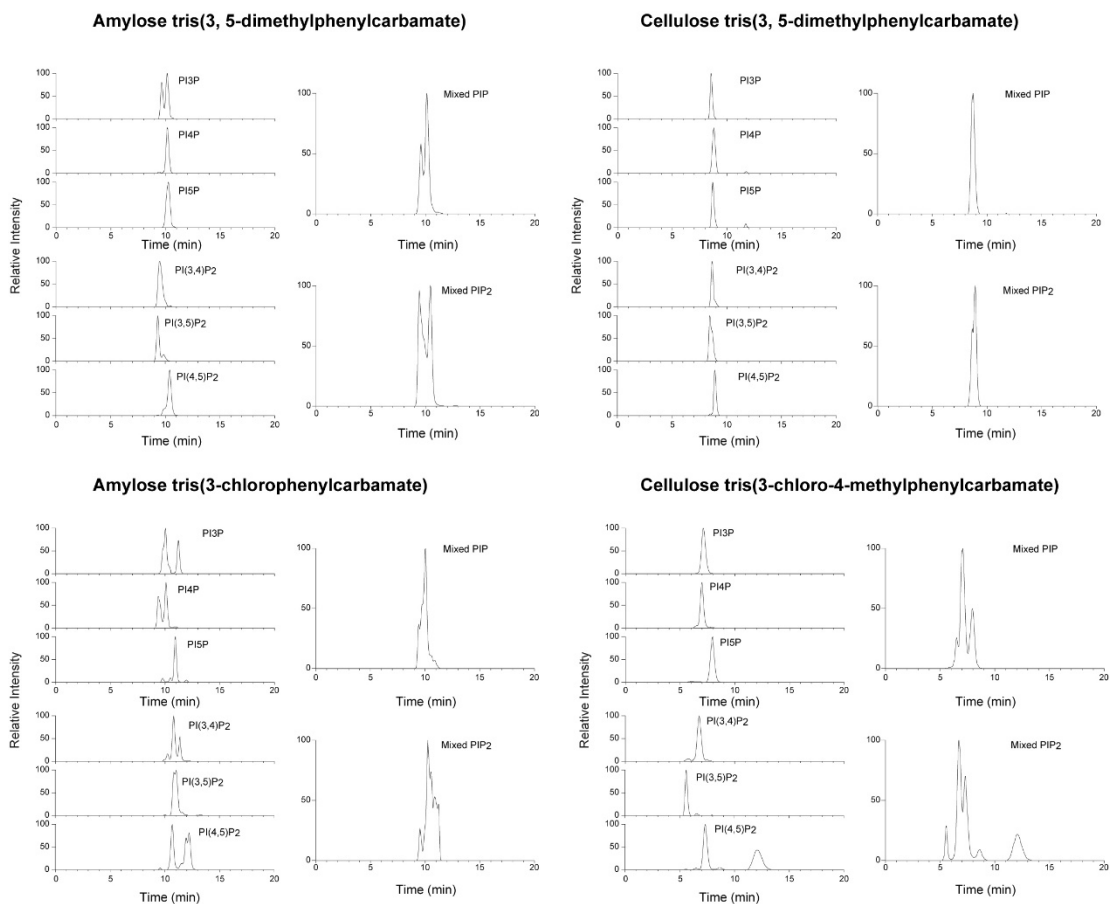

Figure S1

**Supplementary Figure 1. Mass spectra obtained from chiral-HPLC-MS/MS analyses with four different chiral selectors.** Standard C37:4 PIP and PIP<sub>2</sub> regioisomers were analyzed using the PRMC-MS protocol except that the indicated chiral selectors were used for HPLC separation. Due to inadequate retention time differences, none of these selectors enabled simultaneous and comprehensive measurement of regioisomers.

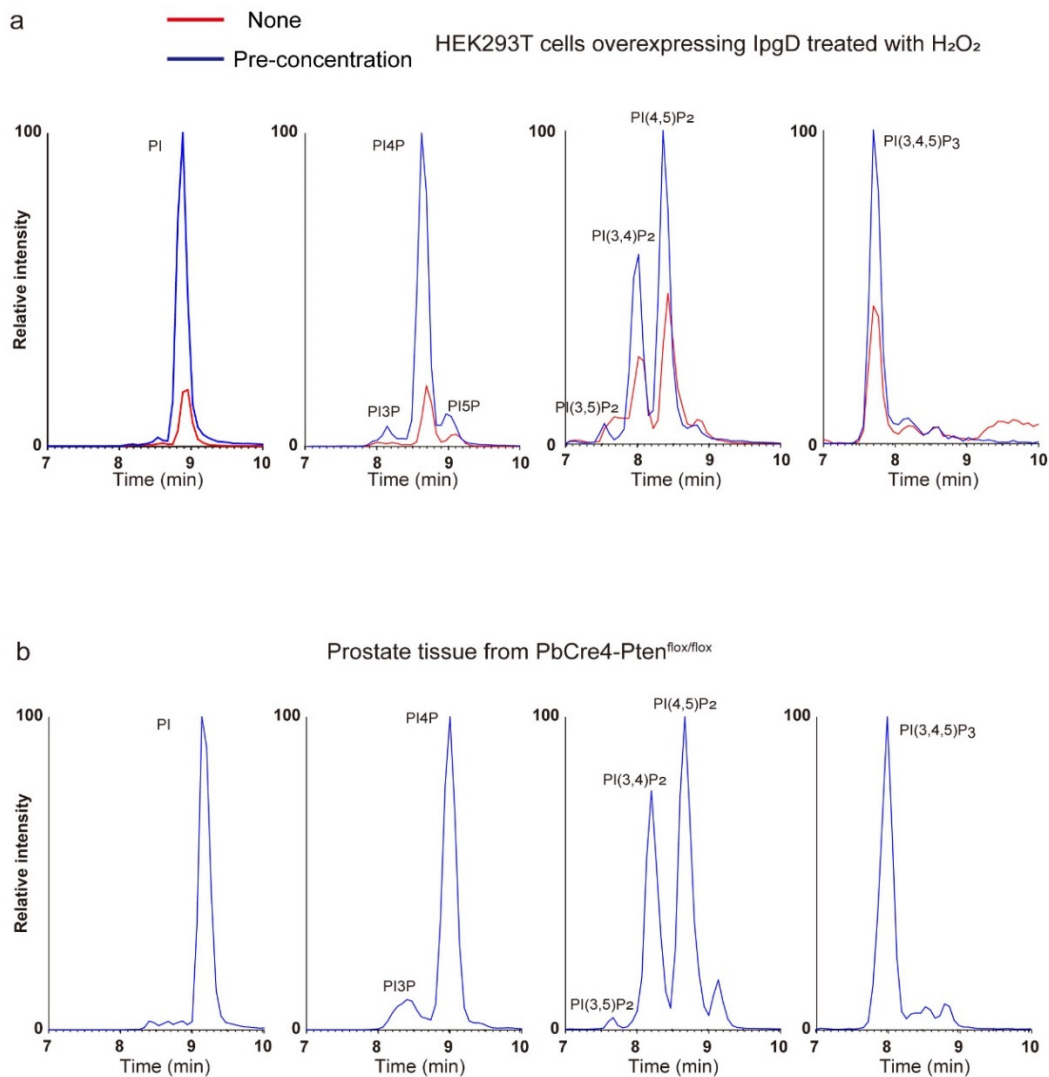

Figure S2

**Supplementary Figure 2. Typical mass spectra from PRMC-MS analysis of biological samples.**

**a**, Lipids were extracted from HEK293T cells that were transfected with an IpgD expression vector and then treated with 10 mM hydrogen peroxide for 2 min. Lipid extracts were processed either with (blue lines) or without (red lines) pre-concentration using DEAE Sepharose and analyzed with PRMC-MS. Chromatograms of C38:4 PI, PIP, PIP<sub>2</sub>, and PIP<sub>3</sub> are shown. Note that pre-concentration increases the sensitivity of detection of each phosphoinositide variant by PRMC-MS. **b**, PRMC-MS chromatograms of C34:1 acyl variants of PI, PIP, PIP<sub>2</sub>, and PIP<sub>3</sub> in a prostate tissue sample from a *PbCre4-Pten<sup>flx/flx</sup>* mouse.

a C34:1 variants

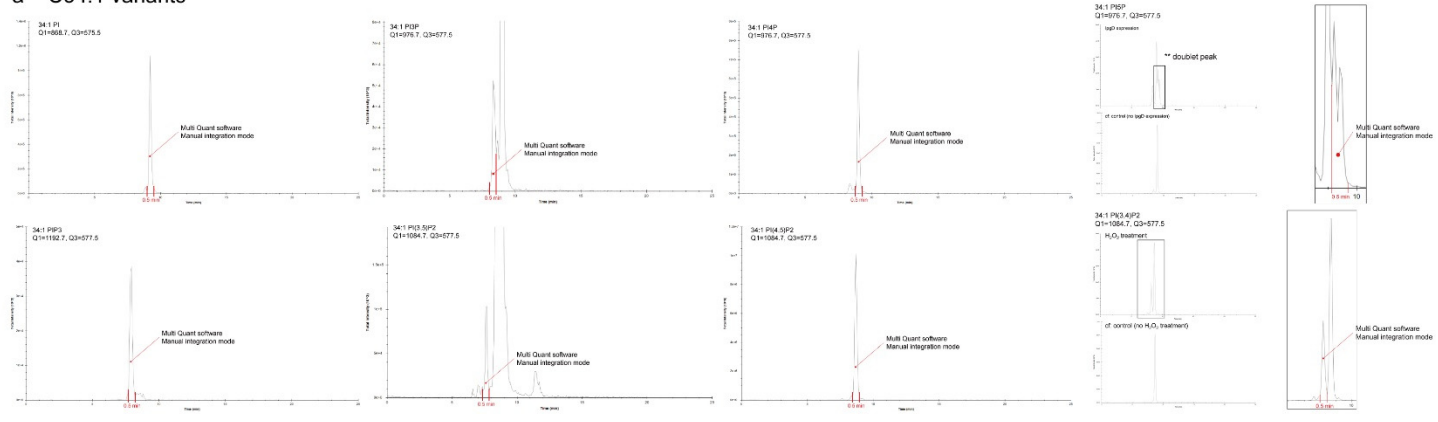

b C36:1 variants

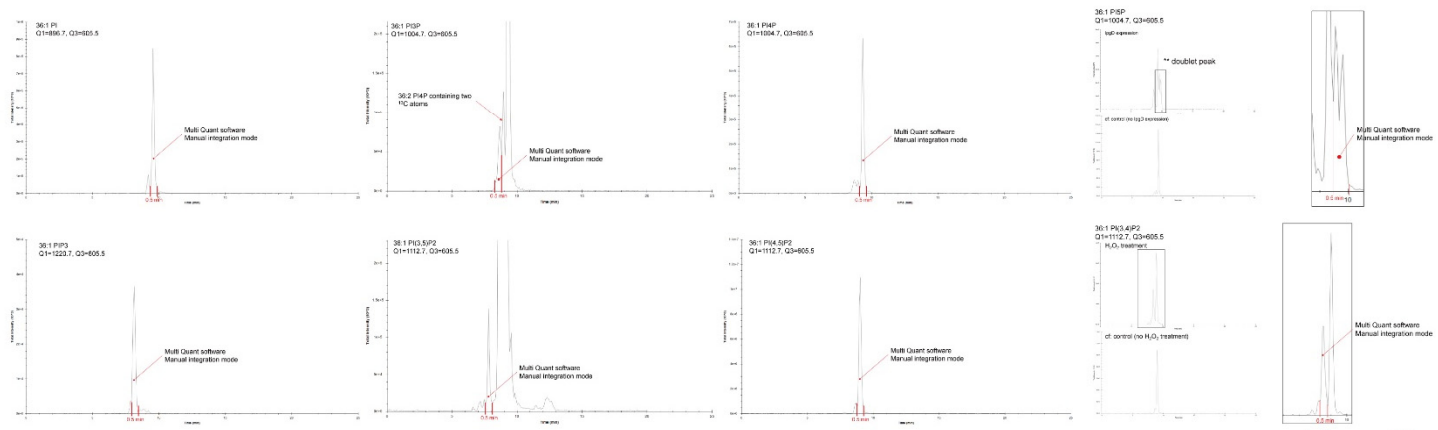

Figure S3

c C36:2 variants

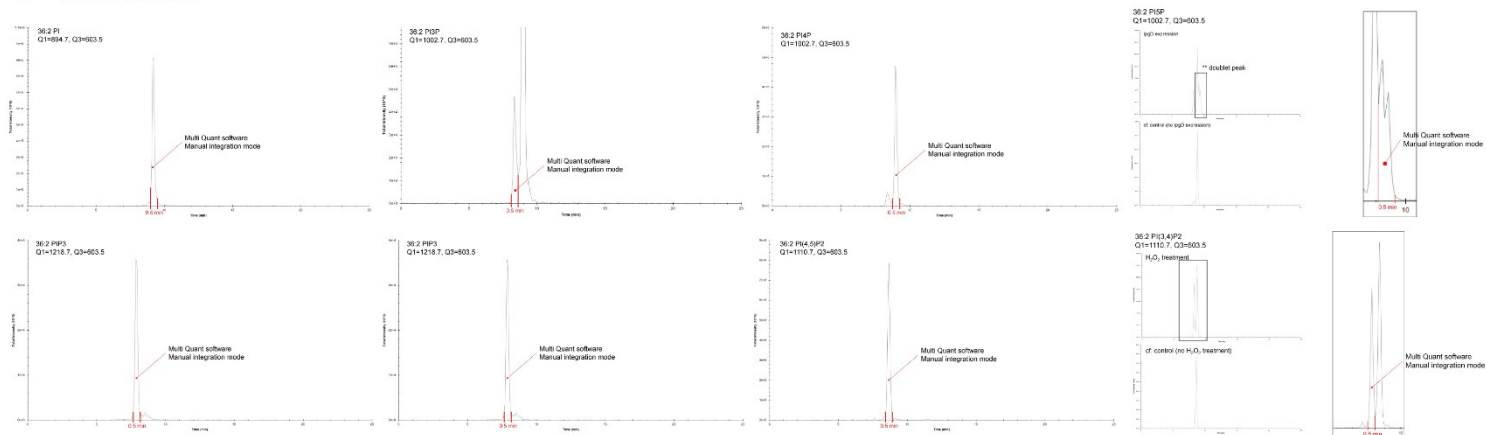

d C38:3 variants

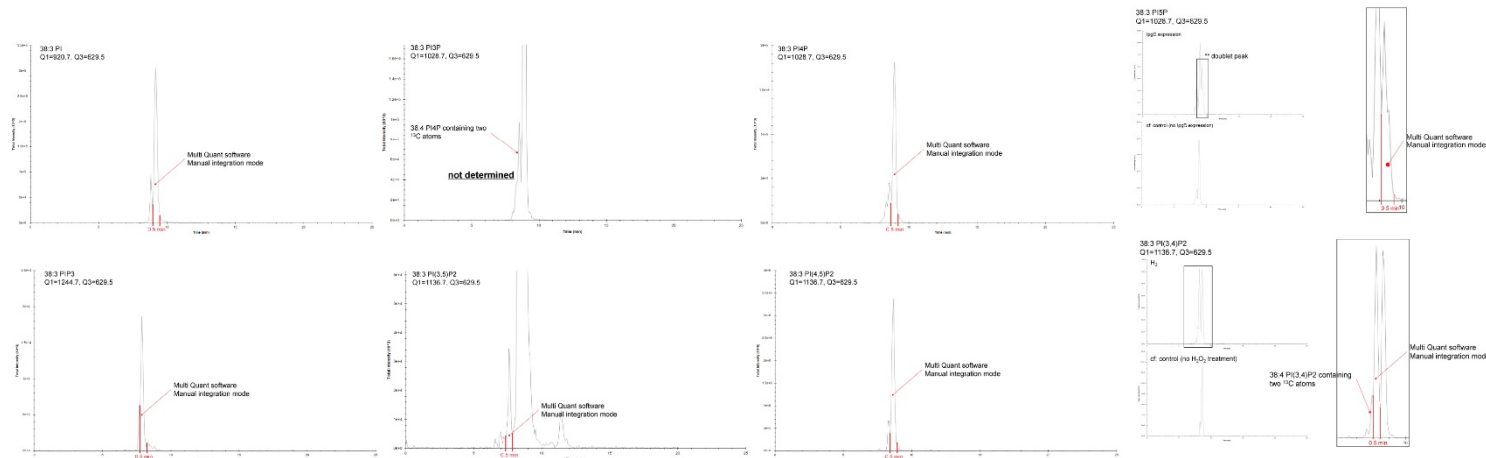

Figure S3

e C38:4 variants

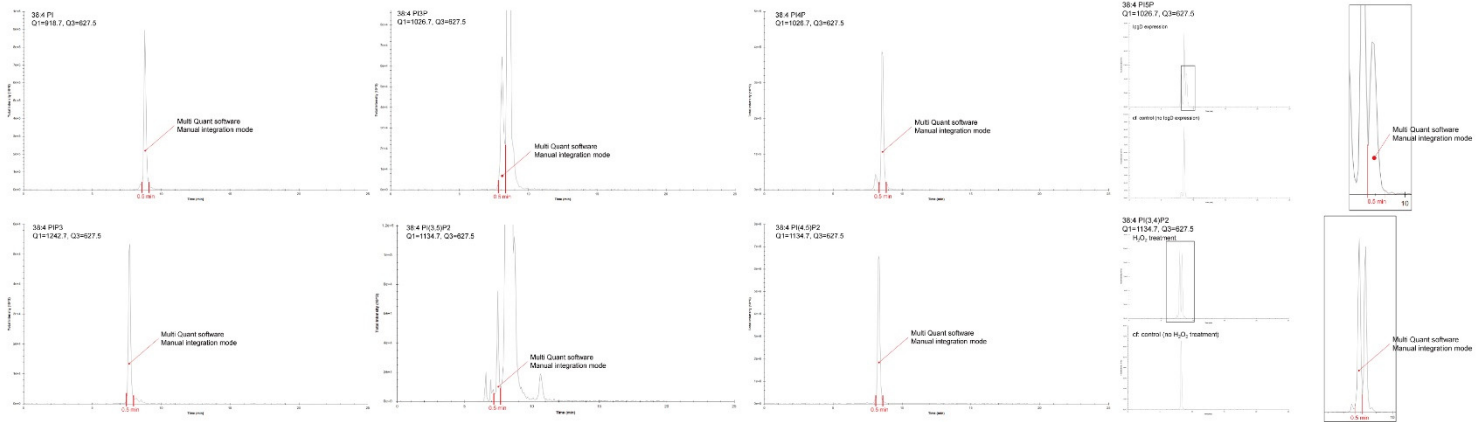

f C40:6 variants

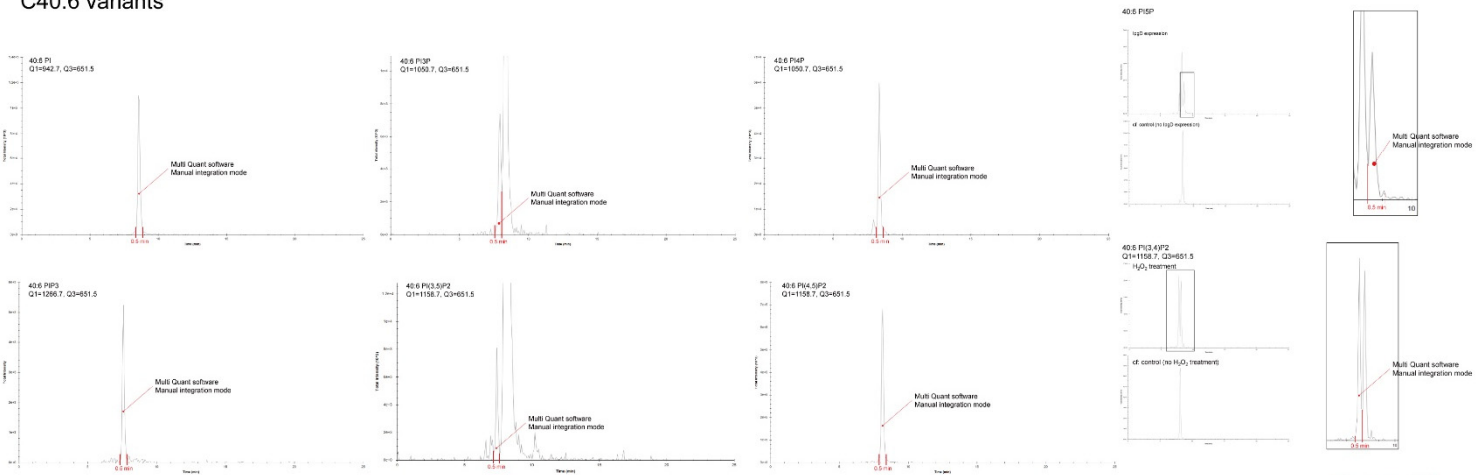

Figure S3

**Supplementary Figure 3. Representative peak integration profiles.** Chromatograms were obtained from PRMC-MS analysis of HEK293T cells. Analyst 1.6.3 (SCIEX) was used for data acquisition and processing. MultiQuant (SCIEX) was used for manual data evaluation for peak integration. No background subtraction was performed. Gaussian smoothing width was 1.0 points. For quality control, the peaks from a sample run in which the cps of the surrogate internal standards (C37:4 phosphoinositides) from the MRM scan below  $2 \times 10^4$  were not subjected to quantification analysis. Note the occurrence of peaks corresponding to PI5P and PI(3,4)P<sub>2</sub> in response to IpgD expression and hydrogen peroxide treatment, respectively.

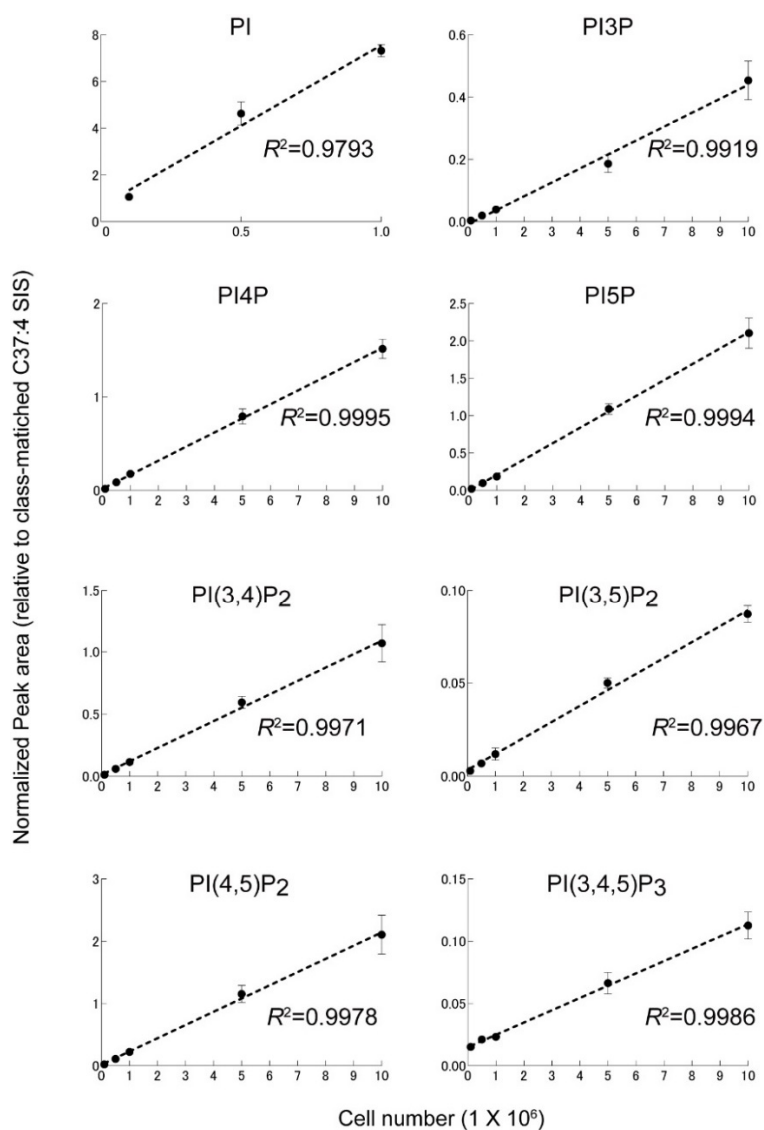

Figure S4

**Supplementary Figure 4. Linear correlation between cell number and peak area of C38:4 phosphoinositides.** Linear regression determination of cell number vs. peak area for the C38:4 acyl variant of each of the eight phosphoinositide classes. Phosphoinositides in 0.1, 0.5, 1, 5, or 10 x 10<sup>6</sup> HEK293T cells (n=3) were measured by PRMC-MS. Cells that either overexpressed IpgD or were treated with hydrogen peroxide were used to measure PI(5)P or PI(3,4)P<sub>2</sub>, respectively. The same linear regression analysis was performed for another 113 acyl variants using the Graph Pad Prism (GraphPad Software Inc.), and these results are summarized in Table S3. R<sup>2</sup>, correlation coefficient. Data are the mean ± SD (n=3 biologically independent samples). Source data are provided as a Source Data file.



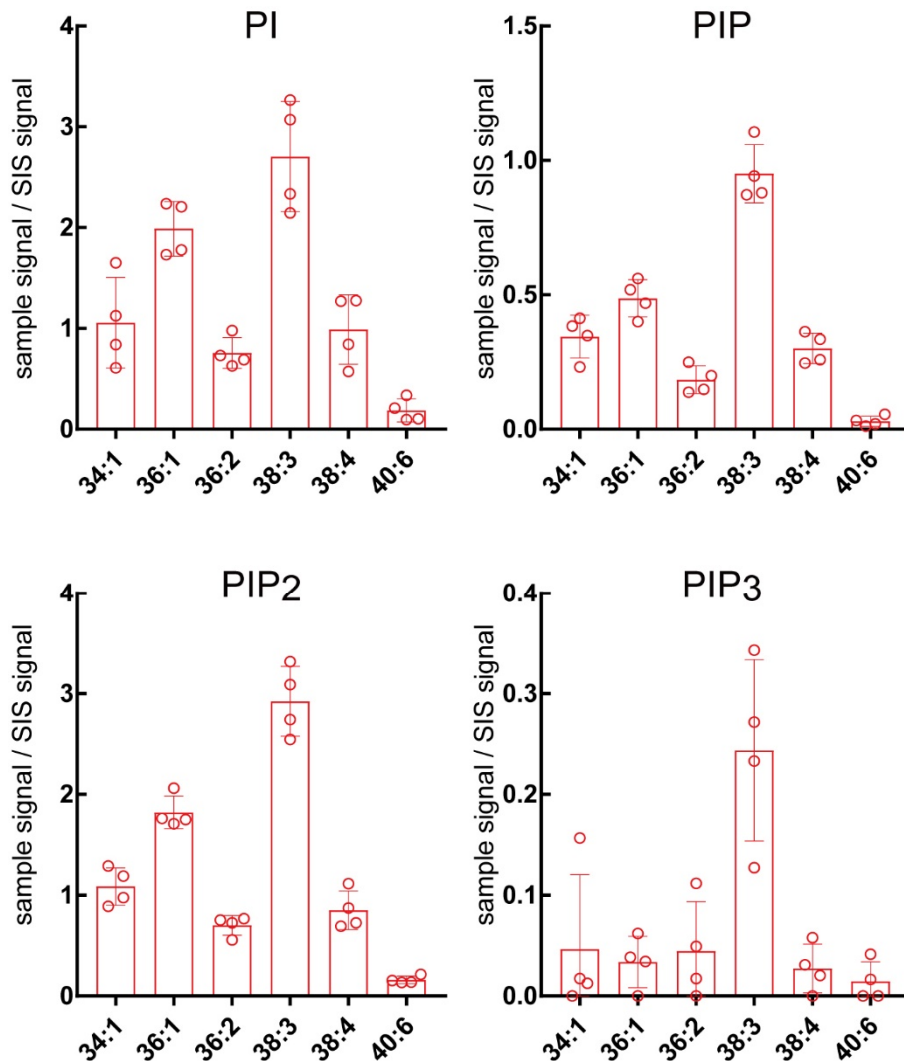

Figure S5

**Supplementary Figure 5. Exosomal phosphoinositides examined by reverse-phase chromatography-mass spectrometry.** Quantitation of the indicated phosphoinositides in exosome preparations. Lipids were separated by a C18 reverse-phase column and analyzed for the indicated acyl variants of PI, PIP, PIP<sub>2</sub>, and PIP<sub>3</sub> using a triple quadrupole mass spectrometer and the same MRM method. This method does not distinguish between regioisomers of PIP and PIP<sub>2</sub>. Data are the mean  $\pm$  SD (n=4 biologically independent samples). Source data are provided as a Source Data file.

**Supplementary Table 1. Calibration regression lines for synthetic phosphoinositide standards.**

| Phosphoinositide              | $R^2$ value<br>(2-100 fmol) | $R^2$ value<br>(2 fmol-50 pmol) | LOD (fmol) | LOQ (fmol) | CV (%)<br>(n=50) |
|-------------------------------|-----------------------------|---------------------------------|------------|------------|------------------|
| C37:4 PI                      | 0.9997                      | 0.9957                          | 2.45       | 7.42       | 11.3             |
| C37:4 PI3P                    | 0.9979                      | 0.9969                          | 6.43       | 19.5       | 8.4              |
| C37:4 PI4P                    | 0.9971                      | 0.9858                          | 7.52       | 22.8       | 12.0             |
| C37:4 PI5P                    | 0.9982                      | 0.9935                          | 6.01       | 18.2       | 10.2             |
| C37:4 PI(3,4)P <sub>2</sub>   | 0.9964                      | 0.9990                          | 8.46       | 25.6       | 9.1              |
| C37:4 PI(3,5)P <sub>2</sub>   | 0.9987                      | 0.9955                          | 5.00       | 15.2       | 10.6             |
| C37:4 PI(4,5)P <sub>2</sub>   | 0.9993                      | 0.9995                          | 3.60       | 10.9       | 8.5              |
| C37:4 PI(3,4,5)P <sub>3</sub> | 0.9983                      | 0.9966                          | 5.85       | 17.7       | 11.4             |
| C38:4 PI                      | 0.9843                      | 0.9898                          | 17.70      | 53.26      | n.d.             |
| C38:4 PI3P                    | 0.9936                      | 0.9992                          | 11.27      | 34.16      | n.d.             |
| C38:4 PI4P                    | 0.9935                      | 0.9950                          | 11.29      | 34.20      | n.d.             |
| C38:4 PI5P                    | 0.9975                      | 0.9997                          | 7.00       | 21.20      | n.d.             |
| C38:4 PI(3,4)P <sub>2</sub>   | 0.9992                      | 0.9995                          | 4.00       | 12.12      | 5.7              |
| C38:4 PI(3,5)P <sub>2</sub>   | 0.9996                      | 0.9977                          | 2.88       | 8.73       | 4.9              |
| C38:4 PI(4,5)P <sub>2</sub>   | 0.9997                      | 0.9995                          | 2.44       | 7.41       | 5.6              |
| C38:4 PI(3,4,5)P <sub>3</sub> | 0.9999                      | 0.9974                          | 1.30       | 3.94       | 5.2              |

$R^2$ , correlation coefficient; LOD, lower limit of detection; LOQ, lower limit of quantification; CV, coefficient of variation. LOD and LOQ were determined by the calibration curve method. Average peak area of each analyte was plotted against concentration (2, 5, 10, 20, 50 and 100 fmol). LOD and LOQ were expressed as  $3.3 \times \text{Syx}/a$  and  $10.0 \times \text{Syx}/a$ , respectively, where Syx is residual variance due to regression

and “a” is the mean slope of the linear regression curves obtained by GraphPad Prism (GraphPad software Inc.). n.d., not determined. Source data are provided as a Source Data file.

**Supplementary Table 2. MRM transitions and collision energy values used to measure each phosphoinositide acyl variant.**

| Acyl variant        | Q1<br>(parent $m/z$ ) | Q3<br>(fragment $m/z$ ) | Collision energy<br>(eV) |
|---------------------|-----------------------|-------------------------|--------------------------|
| 32:1 PI             | 840.7                 | 549.5                   | 32                       |
| 32:0 PI             | 842.7                 | 551.5                   | 32                       |
| 34:2 PI             | 866.7                 | 575.5                   | 32                       |
| 34:1 PI             | 868.7                 | 577.5                   | 32                       |
| 34:0 PI             | 870.7                 | 579.5                   | 32                       |
| 36:4 PI             | 890.7                 | 599.5                   | 33                       |
| 36:3 PI             | 892.7                 | 601.5                   | 33                       |
| 36:2 PI             | 894.7                 | 603.5                   | 33                       |
| 36:1 PI             | 896.7                 | 605.5                   | 33                       |
| 36:0 PI             | 898.7                 | 607.5                   | 33                       |
| 37:4 PI             | 904.7                 | 613.5                   | 34                       |
| 38:6 PI             | 914.7                 | 623.5                   | 34                       |
| 38:5 PI             | 916.7                 | 625.5                   | 34                       |
| 38:4 PI             | 918.7                 | 627.5                   | 34                       |
| 38:3 PI             | 920.7                 | 629.5                   | 34                       |
| 40:6 PI             | 942.7                 | 651.5                   | 35                       |
| 40:5 PI             | 944.7                 | 653.5                   | 35                       |
| 40:4 PI             | 946.7                 | 655.5                   | 35                       |
| 32:1 PI3P/PI4P/PI5P | 948.7                 | 549.5                   | 35                       |
| 32:0 PI3P/PI4P/PI5P | 950.7                 | 551.5                   | 35                       |
| 34:2 PI3P/PI4P/PI5P | 974.7                 | 575.5                   | 35                       |
| 34:1 PI3P/PI4P/PI5P | 976.7                 | 577.5                   | 35                       |
| 34:0 PI3P/PI4P/PI5P | 978.7                 | 579.5                   | 35                       |
| 36:4 PI3P/PI4P/PI5P | 998.7                 | 599.5                   | 36                       |
| 36:3 PI3P/PI4P/PI5P | 1000.7                | 601.5                   | 36                       |
| 36:2 PI3P/PI4P/PI5P | 1002.7                | 603.5                   | 36                       |
| 36:1 PI3P/PI4P/PI5P | 1004.7                | 605.5                   | 36                       |
| 36:0 PI3P/PI4P/PI5P | 1006.7                | 607.5                   | 36                       |
| 37:4 PI3P/PI4P/PI5P | 1012.7                | 613.5                   | 37                       |
| 38:6 PI3P/PI4P/PI5P | 1022.7                | 623.5                   | 37                       |
| 38:5 PI3P/PI4P/PI5P | 1024.7                | 625.5                   | 37                       |

|                                                                          |        |       |    |
|--------------------------------------------------------------------------|--------|-------|----|
| 38:4 PI3P/PI4P/PI5P                                                      | 1026.7 | 627.5 | 37 |
| 38:3 PI3P/PI4P/PI5P                                                      | 1028.7 | 629.5 | 37 |
| 40:6 PI3P/PI4P/PI5P                                                      | 1050.7 | 651.5 | 38 |
| 40:5 PI3P/PI4P/PI5P                                                      | 1052.7 | 653.5 | 38 |
| 40:4 PI3P/PI4P/PI5P                                                      | 1054.7 | 655.5 | 38 |
| <hr/>                                                                    |        |       |    |
| 32:1 PI(3,4)P <sub>2</sub> /PI(3,5)P <sub>2</sub> /PI(4,5)P <sub>2</sub> | 1056.7 | 549.5 | 36 |
| 32:0 PI(3,4)P <sub>2</sub> /PI(3,5)P <sub>2</sub> /PI(4,5)P <sub>2</sub> | 1058.7 | 551.5 | 36 |
| 34:2 PI(3,4)P <sub>2</sub> /PI(3,5)P <sub>2</sub> /PI(4,5)P <sub>2</sub> | 1082.7 | 575.5 | 36 |
| 34:1 PI(3,4)P <sub>2</sub> /PI(3,5)P <sub>2</sub> /PI(4,5)P <sub>2</sub> | 1084.7 | 577.5 | 36 |
| 34:0 PI(3,4)P <sub>2</sub> /PI(3,5)P <sub>2</sub> /PI(4,5)P <sub>2</sub> | 1086.7 | 579.5 | 36 |
| 36:4 PI(3,4)P <sub>2</sub> /PI(3,5)P <sub>2</sub> /PI(4,5)P <sub>2</sub> | 1106.7 | 599.5 | 37 |
| 36:3 PI(3,4)P <sub>2</sub> /PI(3,5)P <sub>2</sub> /PI(4,5)P <sub>2</sub> | 1108.7 | 601.5 | 37 |
| 36:2 PI(3,4)P <sub>2</sub> /PI(3,5)P <sub>2</sub> /PI(4,5)P <sub>2</sub> | 1110.7 | 603.5 | 37 |
| 36:1 PI(3,4)P <sub>2</sub> /PI(3,5)P <sub>2</sub> /PI(4,5)P <sub>2</sub> | 1112.7 | 605.5 | 37 |
| 36:0 PI(3,4)P <sub>2</sub> /PI(3,5)P <sub>2</sub> /PI(4,5)P <sub>2</sub> | 1114.7 | 607.5 | 37 |
| 37:4 PI(3,4)P <sub>2</sub> /PI(3,5)P <sub>2</sub> /PI(4,5)P <sub>2</sub> | 1120.7 | 613.5 | 38 |
| 38:6 PI(3,4)P <sub>2</sub> /PI(3,5)P <sub>2</sub> /PI(4,5)P <sub>2</sub> | 1130.7 | 623.5 | 38 |
| 38:5 PI(3,4)P <sub>2</sub> /PI(3,5)P <sub>2</sub> /PI(4,5)P <sub>2</sub> | 1132.7 | 625.5 | 38 |
| 38:4 PI(3,4)P <sub>2</sub> /PI(3,5)P <sub>2</sub> /PI(4,5)P <sub>2</sub> | 1134.7 | 627.5 | 38 |
| 38:3 PI(3,4)P <sub>2</sub> /PI(3,5)P <sub>2</sub> /PI(4,5)P <sub>2</sub> | 1136.7 | 629.5 | 38 |
| 40:6 PI(3,4)P <sub>2</sub> /PI(3,5)P <sub>2</sub> /PI(4,5)P <sub>2</sub> | 1158.7 | 651.5 | 39 |
| 40:5 PI(3,4)P <sub>2</sub> /PI(3,5)P <sub>2</sub> /PI(4,5)P <sub>2</sub> | 1160.7 | 653.5 | 39 |
| 40:4 PI(3,4)P <sub>2</sub> /PI(3,5)P <sub>2</sub> /PI(4,5)P <sub>2</sub> | 1162.7 | 655.5 | 39 |
| <hr/>                                                                    |        |       |    |
| 32:1 PI(3,4,5)P <sub>3</sub>                                             | 1164.7 | 549.5 | 38 |
| 32:0 PI(3,4,5)P <sub>3</sub>                                             | 1166.7 | 551.5 | 38 |
| 34:2 PI(3,4,5)P <sub>3</sub>                                             | 1190.7 | 575.5 | 38 |
| 34:1 PI(3,4,5)P <sub>3</sub>                                             | 1192.7 | 577.5 | 38 |
| 34:0 PI(3,4,5)P <sub>3</sub>                                             | 1194.7 | 579.5 | 38 |
| 36:4 PI(3,4,5)P <sub>3</sub>                                             | 1214.7 | 599.5 | 39 |
| 36:3 PI(3,4,5)P <sub>3</sub>                                             | 1216.7 | 601.5 | 39 |
| 36:2 PI(3,4,5)P <sub>3</sub>                                             | 1218.7 | 603.5 | 39 |
| 36:1 PI(3,4,5)P <sub>3</sub>                                             | 1220.7 | 605.5 | 39 |
| 36:0 PI(3,4,5)P <sub>3</sub>                                             | 1222.7 | 607.5 | 39 |
| 37:4 PI(3,4,5)P <sub>3</sub>                                             | 1228.7 | 613.5 | 40 |
| 38:6 PI(3,4,5)P <sub>3</sub>                                             | 1238.7 | 623.5 | 40 |
| 38:5 PI(3,4,5)P <sub>3</sub>                                             | 1240.7 | 625.5 | 40 |

|                              |        |       |    |
|------------------------------|--------|-------|----|
| 38:4 PI(3,4,5)P <sub>3</sub> | 1242.7 | 627.5 | 40 |
| 38:3 PI(3,4,5)P <sub>3</sub> | 1244.7 | 629.5 | 40 |
| 40:6 PI(3,4,5)P <sub>3</sub> | 1266.7 | 651.5 | 41 |
| 40:5 PI(3,4,5)P <sub>3</sub> | 1268.7 | 653.5 | 41 |
| 40:4 PI(3,4,5)P <sub>3</sub> | 1270.7 | 655.5 | 41 |

---

**Supplementary Table 3. Linear dynamic ranges for specific phosphoinositide acyl variants.**

Calibration ranges that gave the correlation coefficient ( $R^2$ ) between cell number and phosphoinositide quantity listed was 0.1-1 x 10<sup>6</sup> cells for PI and 0.1-10 x 10<sup>6</sup> cells for other classes. Also see the linear regression lines for the C38:4 phosphoinositides in Figure S4.

N.A., not available (due to incomplete peak separation and poor reproducibility). Source data are provided as a Source Data file.

|       | PI     | PI3P   | PI4P   | PI5P   | PI(3,4)P <sub>2</sub> | PI(3,5)P <sub>2</sub> | PI(4,5)P <sub>2</sub> | PI(3,4,5)P <sub>3</sub> |
|-------|--------|--------|--------|--------|-----------------------|-----------------------|-----------------------|-------------------------|
| C32:0 | 0.9782 | N.A.   | 0.9905 | 0.9998 | 0.9986                | 0.9608                | 0.9878                | 0.9953                  |
| C32:1 | 0.9766 | 0.9823 | 0.9970 | 0.9996 | 0.9991                | 0.9986                | 0.9929                | 0.9802                  |
| C34:0 | 0.8674 | N.A.   | 0.9760 | N.A.   | N.A.                  | 0.9477                | 0.9903                | N.A.                    |
| C34:1 | 0.9709 | 0.9909 | 0.9939 | 0.9999 | 0.9993                | 0.9849                | 0.9856                | 0.9955                  |
| C34:2 | 0.9884 | 0.9866 | 0.9908 | 0.9988 | 0.9994                | 0.9999                | 0.9979                | 0.9984                  |
| C36:1 | 0.9430 | 0.9890 | 0.9947 | 0.9980 | 0.9999                | 0.9870                | 0.9958                | 0.9912                  |
| C36:2 | 0.9911 | 0.9925 | 0.9976 | 0.9998 | 0.9996                | 0.9957                | 0.9951                | 0.9915                  |
| C36:3 | 0.9899 | 0.9688 | 0.9993 | 0.9991 | 0.9994                | 0.9924                | 0.9984                | 0.9947                  |
| C36:4 | 0.9894 | 0.9817 | 0.9935 | 0.9931 | 0.9998                | 0.9731                | 0.9964                | 0.9598                  |
| C38:3 | 0.9700 | N.A.   | 0.9977 | 0.9999 | 0.9981                | 0.9958                | 0.9956                | 0.9885                  |
| C38:4 | 0.9793 | 0.9919 | 0.9995 | 0.9994 | 0.9971                | 0.9967                | 0.9978                | 0.9986                  |
| C38:5 | 0.9922 | 0.9801 | 0.9993 | 0.9968 | 0.9987                | 0.9477                | 0.9918                | 0.9973                  |
| C38:6 | 0.9956 | 0.9925 | 0.9967 | 0.9658 | 0.9978                | 0.9533                | 0.9967                | 0.9879                  |
| C40:4 | 0.9783 | N.A.   | 0.9931 | 0.9999 | 0.9865                | 0.9686                | 0.9939                | 0.9650                  |
| C40:5 | 0.9856 | N.A.   | 0.9995 | 0.9993 | 0.9955                | 0.9937                | 0.9950                | 0.9821                  |
| C40:6 | 0.9826 | 0.9768 | 0.9990 | 0.9991 | 0.9969                | 0.9909                | 0.9972                | 0.9986                  |
